# Supplementary material for: A Universal Atomic Substitution Conversion Strategy Towards Synthesis of Large-Size Ultrathin Nonlayered Two-Dimensional Materials
Source: Nanomicro Lett. 2021 Aug 5;13:165. doi: 10.1007/s40820-021-00692-6 (PMC8342677; doi:10.1007/s40820-021-00692-6)
Supplement: Supplementary file 1 — Supplementary file1 (PDF 479 kb) [file 40820_2021_692_MOESM1_ESM.pdf]

Supporting Information for

## **A Universal Atomic Substitution Conversion Strategy Towards Synthesis of Large-Size Ultrathin Nonlayered Two-Dimensional Materials**

Mei Zhao<sup>1,2</sup>, Sijie Yang<sup>2</sup>, Kenan Zhang<sup>3</sup>, Lijie Zhang<sup>4</sup>, Ping Chen<sup>2</sup>, Sanjun Yang<sup>2</sup>,  
Yang Zhao<sup>1</sup>, Xiang Ding<sup>1</sup>, Xiaotao Zu<sup>1</sup>, Yuan Li<sup>2</sup>, Yinghe Zhao<sup>2</sup>, Liang Qiao<sup>1,\*</sup>,  
Tianyou Zhai<sup>2,\*</sup>

<sup>1</sup>School of Physics, University of Electronic Science and Technology of China (UESTC), Chengdu 610054, P. R. China

<sup>2</sup>State Key Laboratory of Materials Processing and Die & Mould Technology, School of Materials Science and Engineering, Huazhong University of Science and Technology (HUST), Wuhan 430074, P. R. China

<sup>3</sup>School of Materials and Energy, Guangdong University of Technology, Guangzhou 510006, P. R. China

<sup>4</sup>Key Laboratory of Carbon Materials of Zhejiang Province, Institute of New Materials and Industrial Technologies, College of Chemistry and Materials Engineering, Wenzhou University, Wenzhou 325035, P. R. China

\*Corresponding authors. E-mail: [liang.qiao@uestc.edu.cn](mailto:liang.qiao@uestc.edu.cn) (Liang Qiao); [zhaity@hust.edu.cn](mailto:zhaity@hust.edu.cn) (Tianyou Zhai)

### **Supplementary Figures**

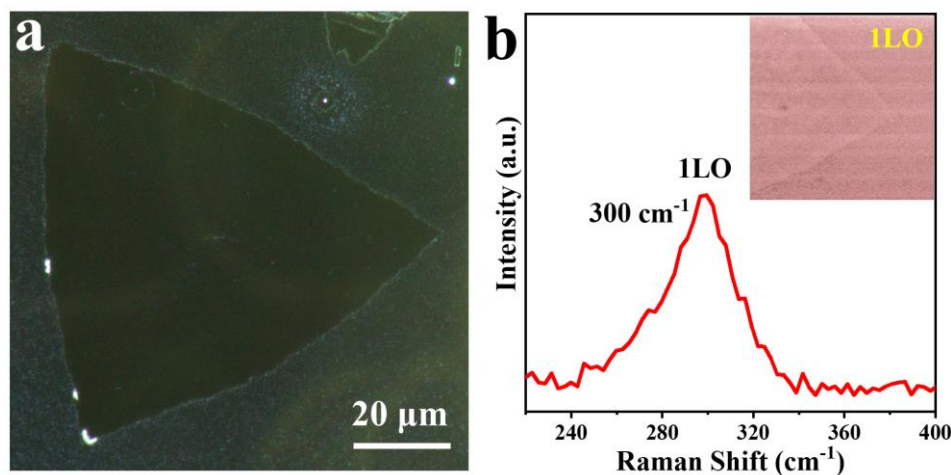

**Fig. S1** Dark-field OM image (a) and Raman spectrum (b) of large-size ultrathin CdS flake in Fig. 3c

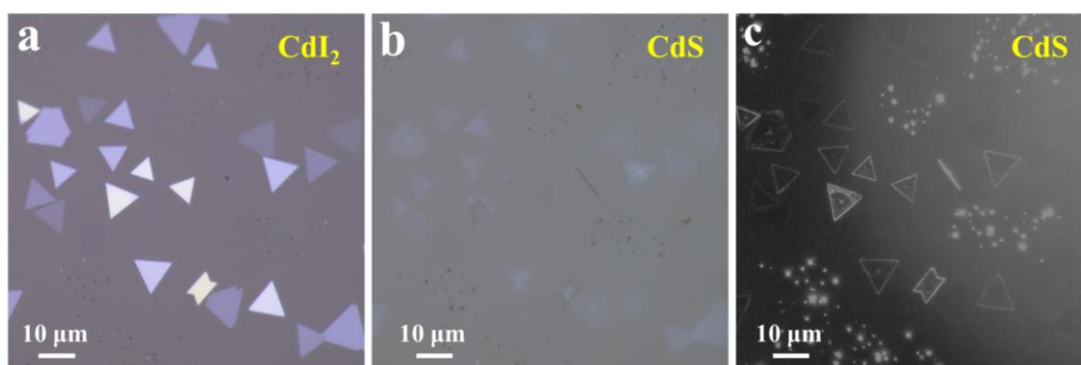

**Fig. S2** Typical bright-field and dark-field OM images of large-area  $\text{CdI}_2$  flakes with various thickness before (a) and after (b, c) conversion into CdS flakes

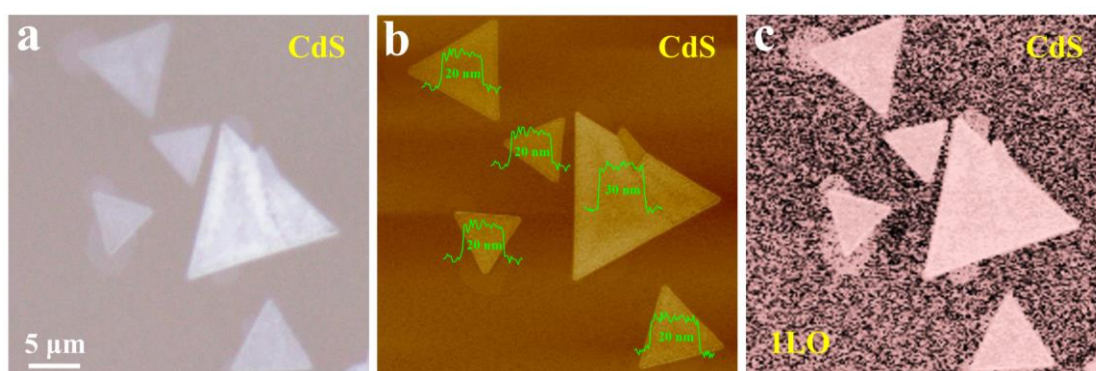

**Fig. S3** Typical OM image (a) and corresponding AFM image (b), and Raman intensity mapping of converted CdS flakes with different thickness (c)

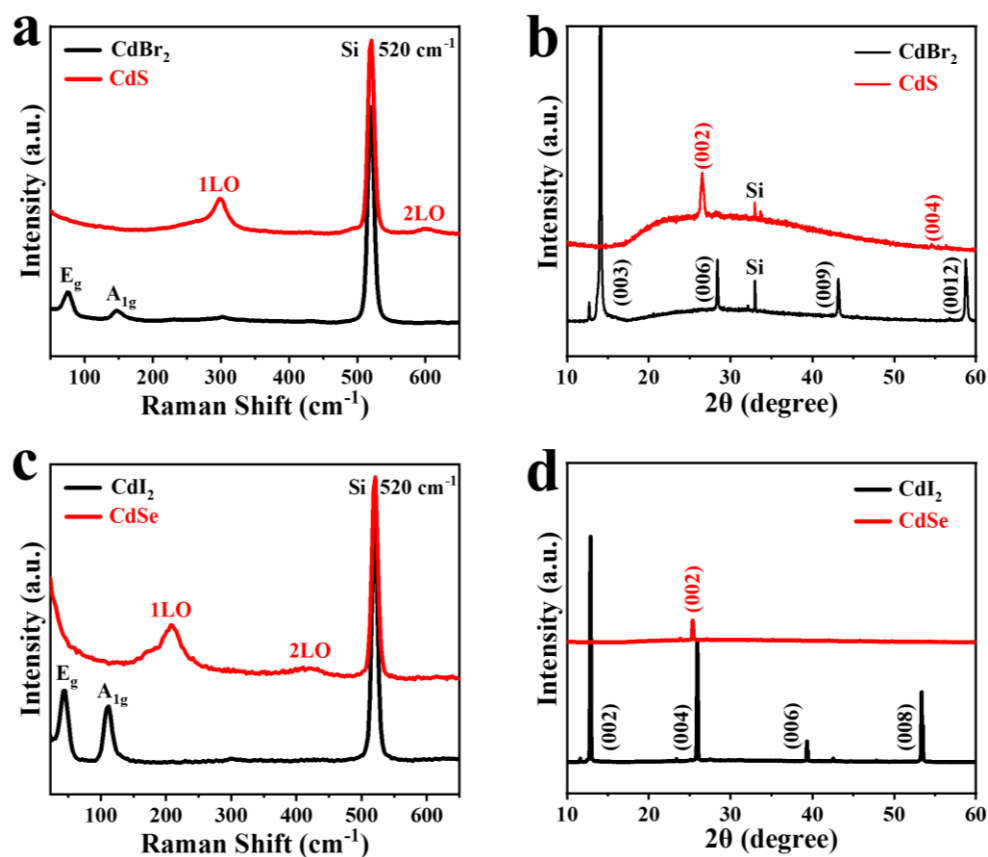

**Fig. S4** **a** Raman spectra of CdBr<sub>2</sub> flakes grown on SiO<sub>2</sub>/Si substrate and corresponding converted CdS flakes. **b** XRD pattern of CdBr<sub>2</sub> flakes grown on SiO<sub>2</sub>/Si substrate and corresponding converted CdS flakes. **c** Raman spectra of CdI<sub>2</sub> flakes grown on SiO<sub>2</sub>/Si substrate and corresponding converted CdSe flakes. **d** XRD pattern of CdI<sub>2</sub> flakes grown on SiO<sub>2</sub>/Si substrate and corresponding converted CdSe flakes

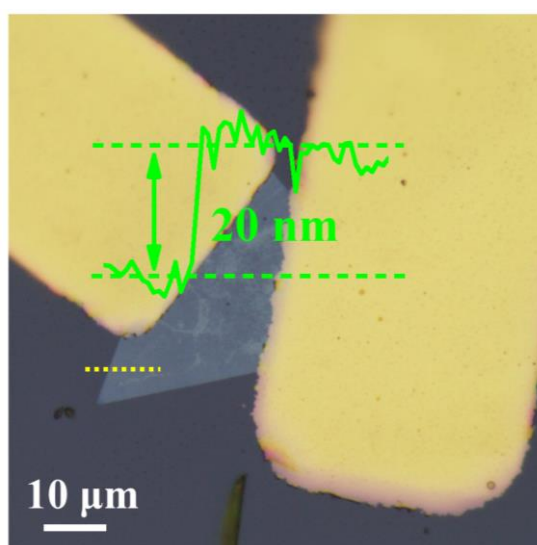

**Fig. S5** OM image and corresponding AFM height profile of the converted CdS flake-based photodetector via the transfer electrode method
